# Supplementary material for: Ferromagnetic Coupling and Single-Ion Magnet Phenomenon in Mononuclear Ruthenium(III) Complexes Based on Guanine Nucleobase
Source: MDPI journal article supplement (doi:10.3390/magnetochemistry8080093), 2022-08-17
Supplement: s1 [file s1]

## Supplementary Materials

# Ferromagnetic coupling and single-ion magnet phenomenon in mononuclear ruthenium(III) complexes based on guanine nucleobase

Marta Orts-Arroyo,<sup>1</sup> Nicolás Moliner,<sup>1</sup> Francesc Lloret<sup>1</sup> and José Martínez-Lillo<sup>1,\*</sup>

<sup>1</sup>Instituto de Ciencia Molecular (ICMol)/Departament de Química Inorgànica, Universitat de València, c/Catedrático José Beltrán 2, Paterna, 46980, València, Spain; marta.orts-arroyo@uv.es (M.O.-A.); fernando.moliner@uv.es (N.M.); francisco.lloret@uv.es (F.L.)

\* Correspondence: f.jose.martinez@uv.es; Tel.: +34-9635-44460

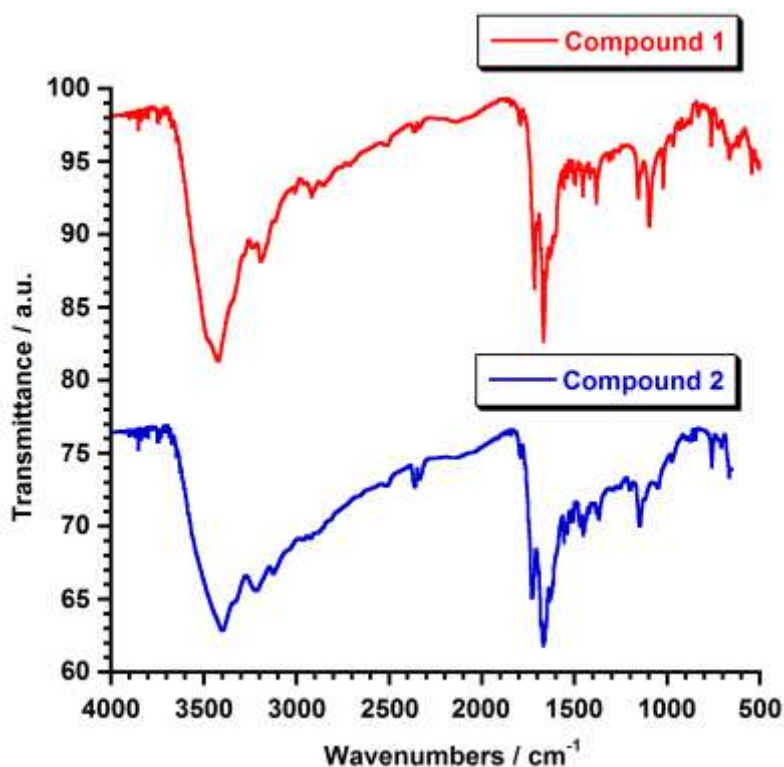

Figure S1. FT-IR spectra for compound 1 (red) and compound 2 (blue).
